# Supplementary material for: Preparation of porous glass films using phase separation phenomenon and growth behavior of phase-separated structure
Source: Springer Nature journal article supplement (doi:10.1007/s10853-013-7618-9), 2013-08-13
Supplement: MOESM1 [file 3520826]

**Supplementary data:**

Preparation of porous glass films using phase separation phenomenon and growth behaviour of phase-separated structure

C Hwang1, J Kim1, B K Ryu1, and H Takebe2

1 Department of Materials Science and Engineering, Pusan National University, San 30, Jangjeon-dong, Geumjeong-gu, Busan 609-735, Republic of Korea

2 Graduate School of Science and Engineering, Ehime University, 3, Bunkyo-cho, Matsuyama-shi, Ehime 790-8577, Japan


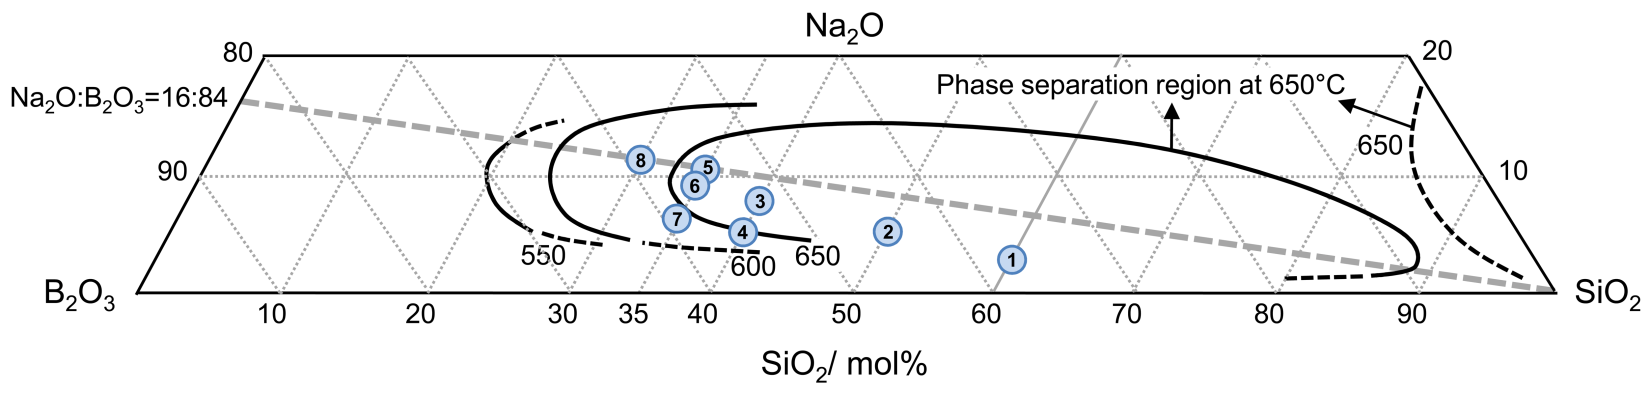


**Supplementary Figure 1.** Phase separation regions at each temperature in the NBS system and compositions of the base glasses. Black solid or dashed lines show the phase separation regions at each temperature reported by O. V. Mazurin and M. V. Streltsina [1]. The phase separation region becomes broader with decreasing temperature down to 550 °C. We have introduced the gray dashed straight line for which the Na2O:B2O3 ratio = 16:84, where the phase separation is maximized in the Na2O-B2O3 binary system [2]. Blue circles show the compositions of the base glasses, and the detailed compositions are shown in manuscript table 1.


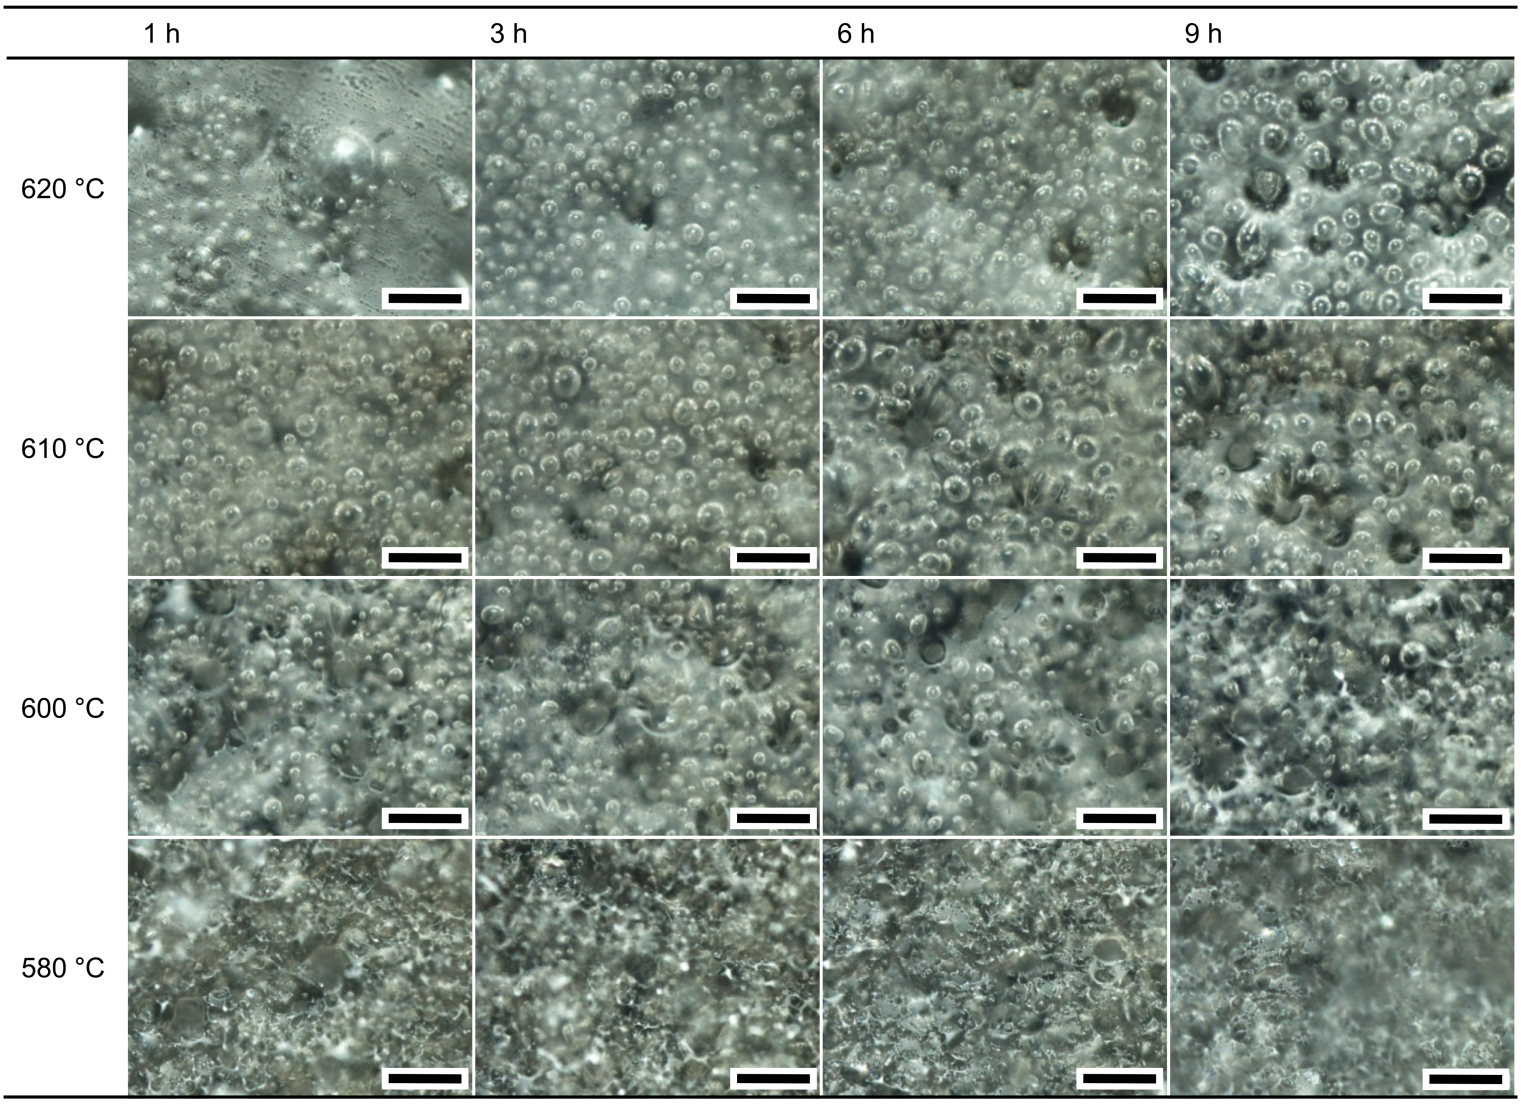


**Supplementary Figure 2.** OM images of 10.4Na2O-54.6B2O3-35SiO2 (mol%) glass films heat-treated under various conditions. Scale bar = 50 μm.

**Supplementary Table 1**. EDX analysis results (element atomic %) for the SiO2-rich phase for samples heat-treated at 620 °C


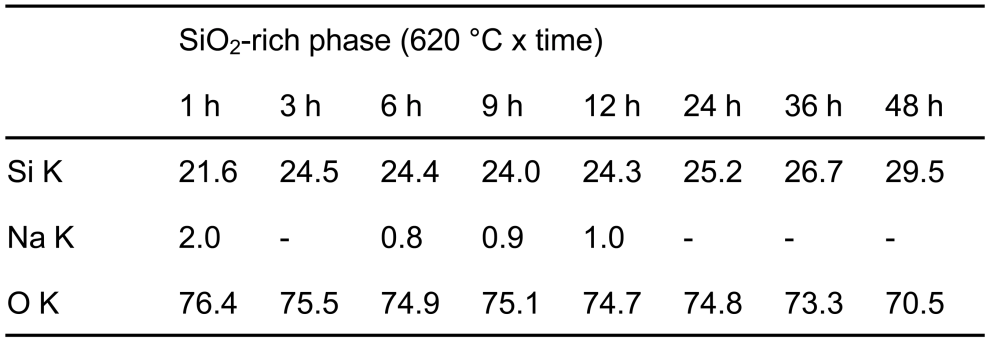


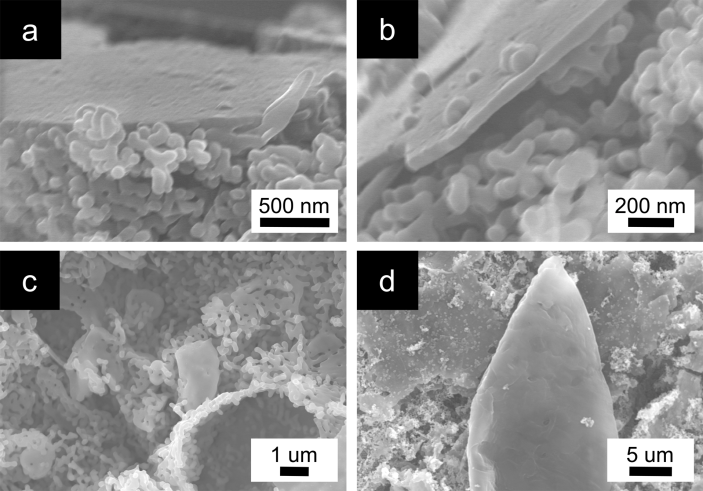


**Supplementary Figure 3**. Representative images of surface layers: (a, b) cross-sectional images of glass films heat-treated at 600 °C for 1 h and (c, d) images of glass films heat-treated at 620 °C for 12 h. Image d shows a peeled-off surface layer.


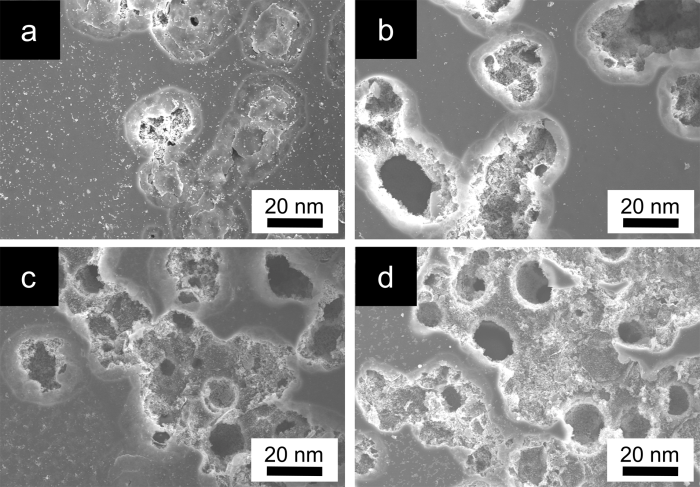


**Supplementary Figure 4**. Effects of sonication and thermal shock loading on the extent of surface-layer elimination. Images were taken after (a) HCl normal etching for 60 sec and (b) HCl etching with sonication for 30 sec and after thermal shock loading (c) 1 time and (d) 3 times. A sample heat-treated at 620 °C for 12 h was etched.


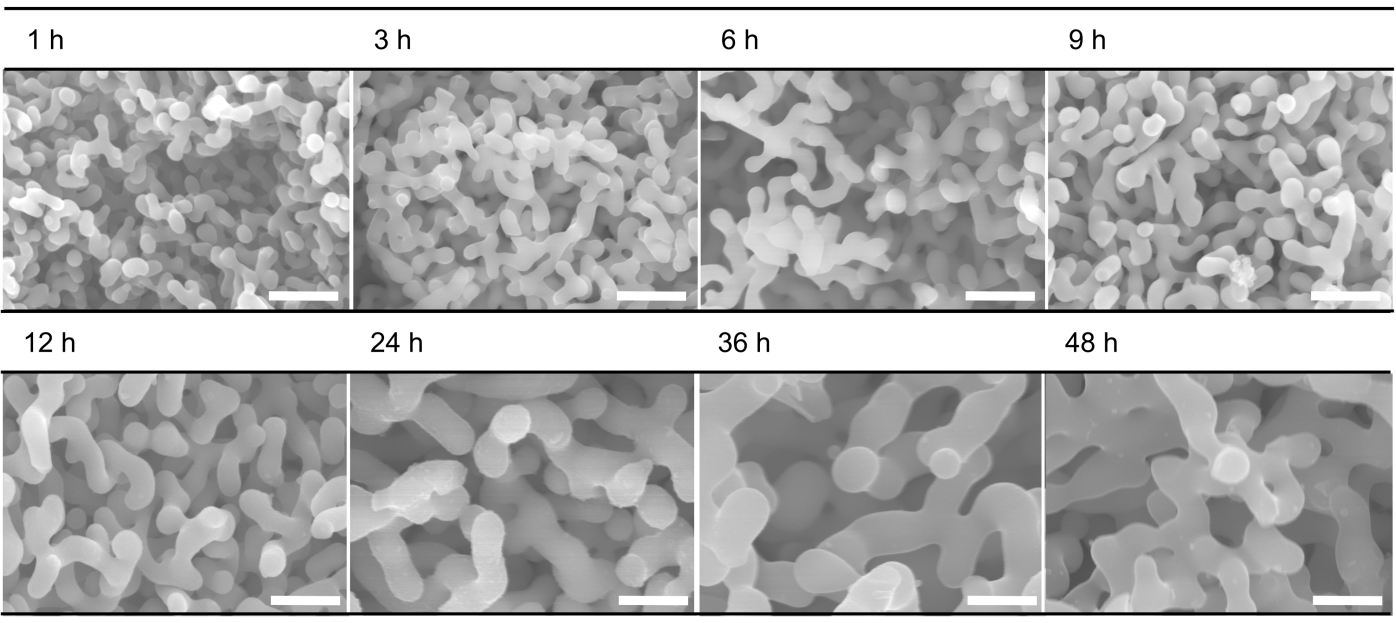


**Supplementary Figure 5**. SEM images showing the effects of prolonged heat-treatment time at 620 °C. Scale bar = 500 nm.

**References**

[1] Mazurin O V and Streltsina M V 1972Determination of Tie-Line Directions in the Metastable Phase-Separation Regions of Ternary Systems *J. Non-Cryst. Solids* **11** 199-218

[2] Vogel W 1994 *Glass Chemistry* (New York: Springer-Verlag) p 145-157
